# Supplementary material for: Dynamics and environmental drivers of methane and nitrous oxide fluxes at the soil and ecosystem levels in a wet tropical forest
Source: Copernicus journal article supplement (doi:10.5194/egusphere-2025-3501), 2025-08-07
Supplement: Supplementary file 1 [file egusphere-2025-3501-supplement.pdf]

1 *For Biogeosciences*

2

3 **Title**

4 **Dynamics and environmental drivers of methane and nitrous oxide fluxes at**  
5 **the soil and ecosystem levels in a wet tropical forest**

6 **Authors**

7 Laëtitia M. Bréchet<sup>1</sup>, Mercedes Ibáñez<sup>1</sup>, Robert B. Jackson<sup>2</sup>, Benoît Burban<sup>1</sup>, Clément Stahl<sup>1</sup>, Damien  
8 Bonal<sup>3</sup>, Ivan A. Janssens<sup>4</sup>

9

**Supplementary material**

**Table S1.** Results of the Kolmogorov-Smirnov tests (p level < 0.05) comparing CH<sub>4</sub> and N<sub>2</sub>O flux distributions at ecosystem and upland-soil level between wettest and driest seasons. Corresponding data are shown in Figure 3.

|                           | CH <sub>4</sub>        |         | N <sub>2</sub> O       |         |
|---------------------------|------------------------|---------|------------------------|---------|
|                           | Alternative hypothesis | p value | Alternative hypothesis | p value |
| <b>Ecosystem fluxes</b>   |                        |         |                        |         |
| <b>Driest vs. Wettest</b> | Greater                | < 0.001 | Less                   | 0.020   |
| <b>Upland soil fluxes</b> |                        |         |                        |         |
| <b>Driest vs. Wettest</b> | Greater                | < 0.001 | Greater                | < 0.001 |

**Table S2.** Fluxes from Table 1 transformed into the most commonly used units in the literature for data contextualisation. Means, standard deviations (SD) and medians of ecosystem and upland soil CH<sub>4</sub> and N<sub>2</sub>O fluxes per season (wettest and driest) in the Guyaflux tropical forest, French Guiana.

Conversion factors: from nmolCH<sub>4</sub> to mgCH<sub>4</sub> x 1.604 x 10<sup>-5</sup>, from nmolN<sub>2</sub>O to mgN<sub>2</sub>O x 4.4013 x 10<sup>-5</sup>.

| Ecosystem flux                       |         |      |        |        |      |        |                |      |        |
|--------------------------------------|---------|------|--------|--------|------|--------|----------------|------|--------|
| Fluxes                               | Wettest |      |        | Driest |      |        | Global average |      |        |
|                                      | Mean    | SD   | Median | Mean   | SD   | Median | Mean           | SD   | Median |
| nmol m <sup>-2</sup> s <sup>-1</sup> |         |      |        |        |      |        |                |      |        |
| CH <sub>4</sub>                      | 2.9     | 3.9  | 2.8    | -0.8   | 3.8  | -0.6   | 1.5            | 4.0  | 1.4    |
| N <sub>2</sub> O                     | 0.5     | 0.7  | 0.4    | 0.5    | 0.8  | 0.6    | 0.6            | 0.8  | 0.5    |
| mg m <sup>-2</sup> day <sup>-1</sup> |         |      |        |        |      |        |                |      |        |
| CH <sub>4</sub>                      | 4.0     | 5.4  | 3.9    | -1.1   | 5.3  | -0.8   | 2.0            | 5.6  | 1.9    |
| N <sub>2</sub> O                     | 1.9     | 2.8  | 1.4    | 2.0    | 3.2  | 2.1    | 2.2            | 3.1  | 1.8    |
| kg ha <sup>-1</sup> yr <sup>-1</sup> |         |      |        |        |      |        |                |      |        |
| CH <sub>4</sub>                      | 14.6    | 19.7 | 14.2   | -4.1   | 19.2 | -3.1   | 7.5            | 20.4 | 7.0    |
| N <sub>2</sub> O                     | 6.9     | 10.1 | 5.0    | 7.2    | 11.6 | 7.7    | 7.9            | 11.2 | 6.6    |
| Upland soil flux                     |         |      |        |        |      |        |                |      |        |
| nmol m <sup>-2</sup> s <sup>-1</sup> |         |      |        |        |      |        |                |      |        |
| CH <sub>4</sub>                      | -0.8    | 0.5  | -0.8   | -1.8   | 0.5  | -1.8   | -1.1           | 0.7  | -1.0   |
| N <sub>2</sub> O                     | 0.1     | 0.1  | 0.1    | 0.0    | 0.1  | 0.0    | 0.1            | 0.1  | 0.1    |
| mg m <sup>-2</sup> day <sup>-1</sup> |         |      |        |        |      |        |                |      |        |
| CH <sub>4</sub>                      | -1.0    | 0.6  | -1.1   | -2.4   | 0.7  | -2.5   | -1.6           | 0.9  | -1.4   |
| N <sub>2</sub> O                     | 0.3     | 0.3  | 0.3    | 0.1    | 0.2  | 0.1    | 0.2            | 0.3  | 0.2    |
| kg ha <sup>-1</sup> yr <sup>-1</sup> |         |      |        |        |      |        |                |      |        |
| CH <sub>4</sub>                      | -3.8    | 2.4  | -4.0   | -8.9   | 2.6  | -9.3   | -5.7           | 3.4  | -5.1   |
| N <sub>2</sub> O                     | 1.1     | 1.0  | 1.0    | 0.3    | 0.8  | 0.2    | 0.8            | 1.0  | 0.8    |

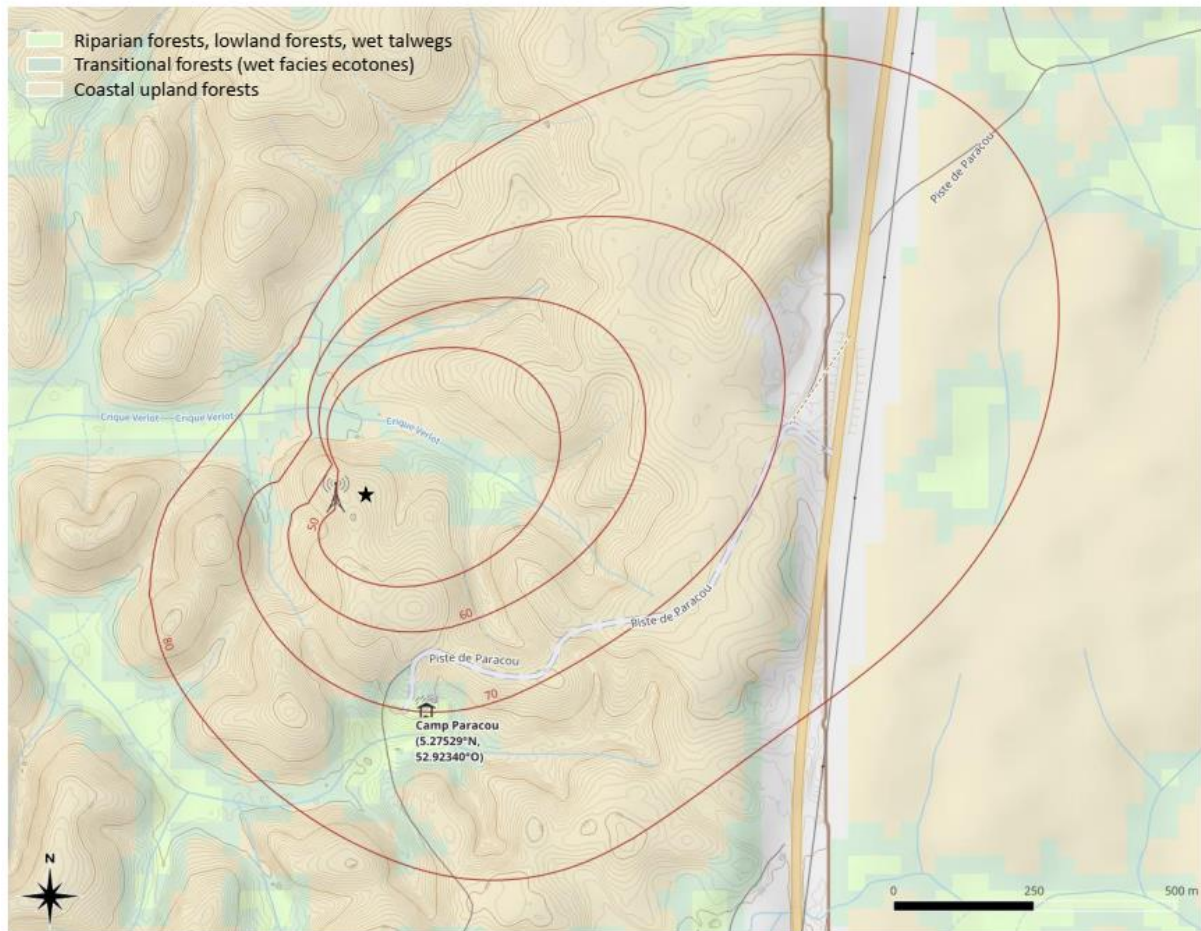

**Figure S1.** Map showing the combination of both the recent annual cumulative footprint climatology for Guyaflux as part of a FLUXNET2015 study (Fang et al., 2024) and the spatial distribution of different forest habitats (Guitet et al., 2015). The red curves show the footprint percentiles at 10% intervals, from 50% (inner), to 80% (outer). The black star, near the flux tower, show the location of the 13 automated soil chambers.

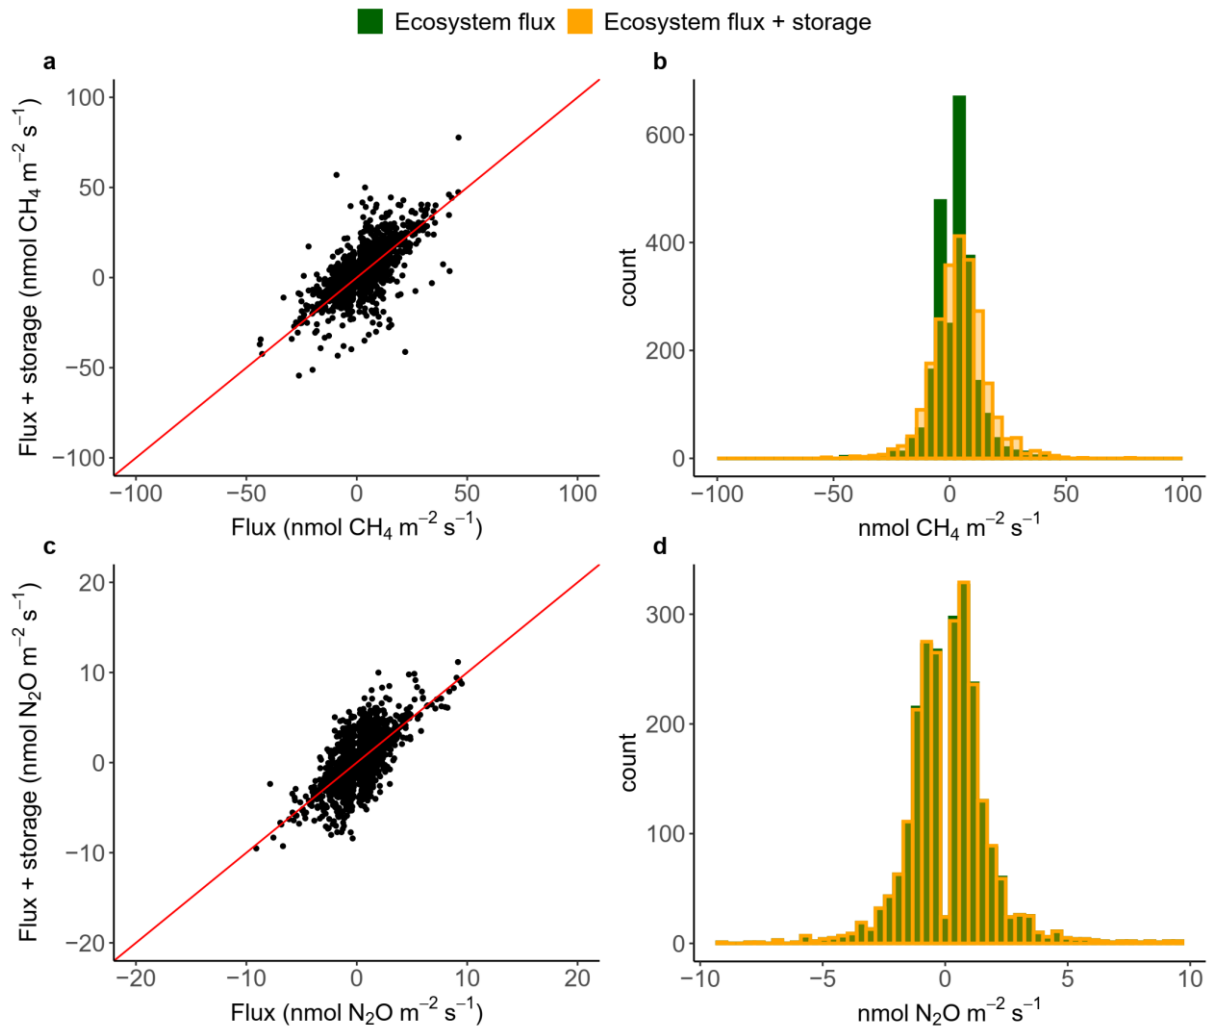

**Figure S2.** Relationships between the half-hourly fluxes of (a)  $\text{CH}_4$  and (c)  $\text{N}_2\text{O}$ , as measured by the eddy covariance technique, and the same fluxes corrected by the storage term (i.e. the accumulation of  $\text{CH}_4$  and  $\text{N}_2\text{O}$  within the forest canopy at night when  $R_g < 5 \text{ W m}^{-2}$ ). The line represents the 1:1 relationship. Corresponding density plots of corrected and non-corrected half-hour fluxes of (b)  $\text{CH}_4$  and (d)  $\text{N}_2\text{O}$ . Data from the Guyaflux tower from 1 January, 2017 to 11 January, 2018, French Guiana.

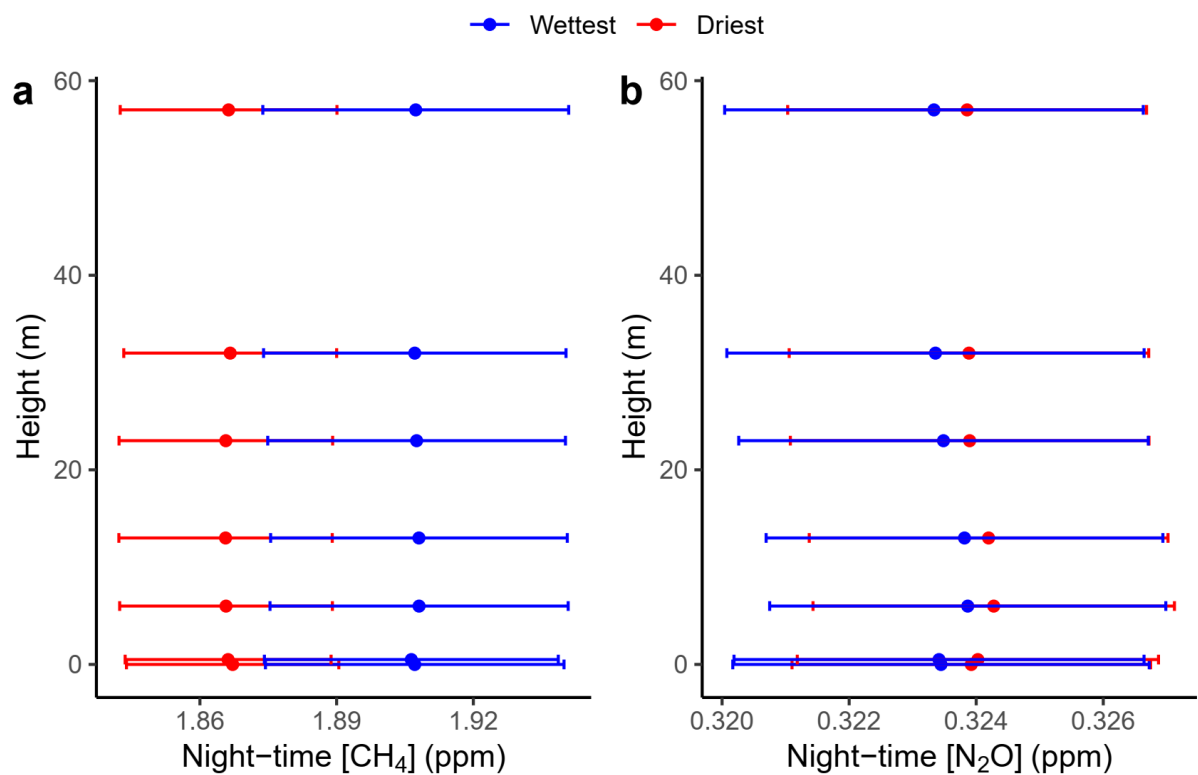

37

38

39

40

**Figure S3.** Night-time ( $R_g < 5 \text{ W m}^{-2}$ ) averaged vertical profiles for (a) [CH<sub>4</sub>] and (b) [N<sub>2</sub>O] measured on an upland forest near the Guyaflux tower for the wettest (blue) and driest (red) seasons from 1 January, 2017 and 11 January, 2018, French Guiana.

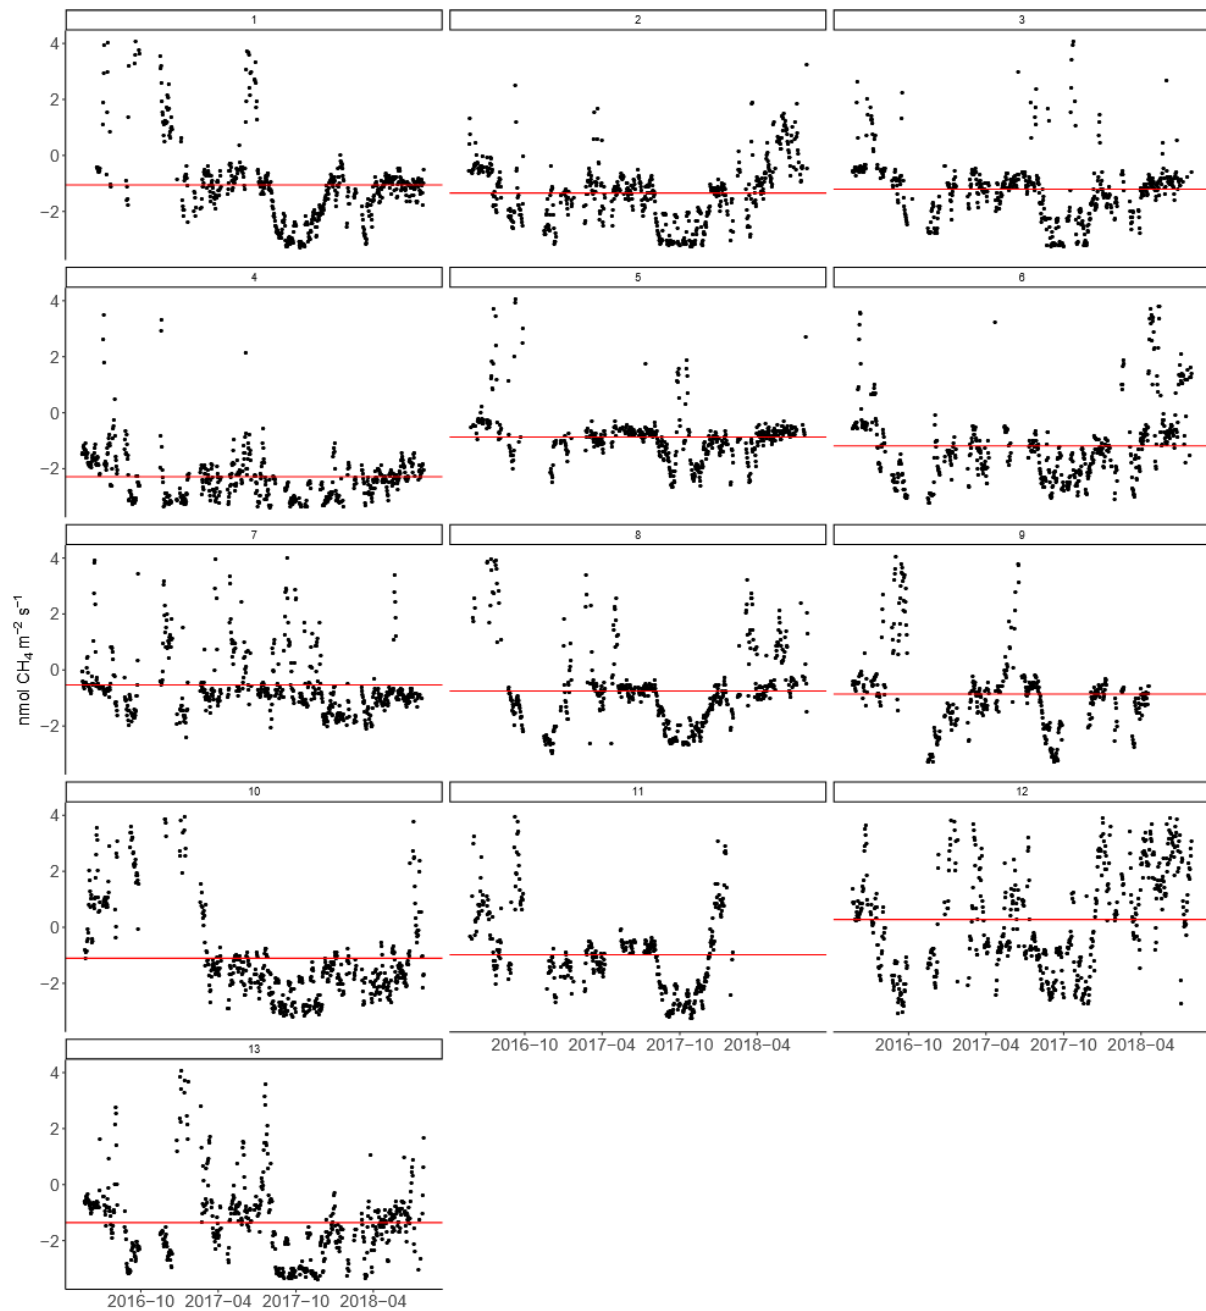

**Figure S4.** Average daily upland soil  $\text{CH}_4$  fluxes per soil chamber (1 to 13) from 17 May, 2016 to 2 August, 2018 in the Guyaflux tropical forest, French Guiana. Fluxes were estimated with a 5-min closure time (see Sect. 2.5, “Chamber-based  $\text{CH}_4$  and  $\text{N}_2\text{O}$  flux computation”, for more details). All panels have the same limits on the y-axis. The horizontal red lines indicate the average flux line for each chamber.

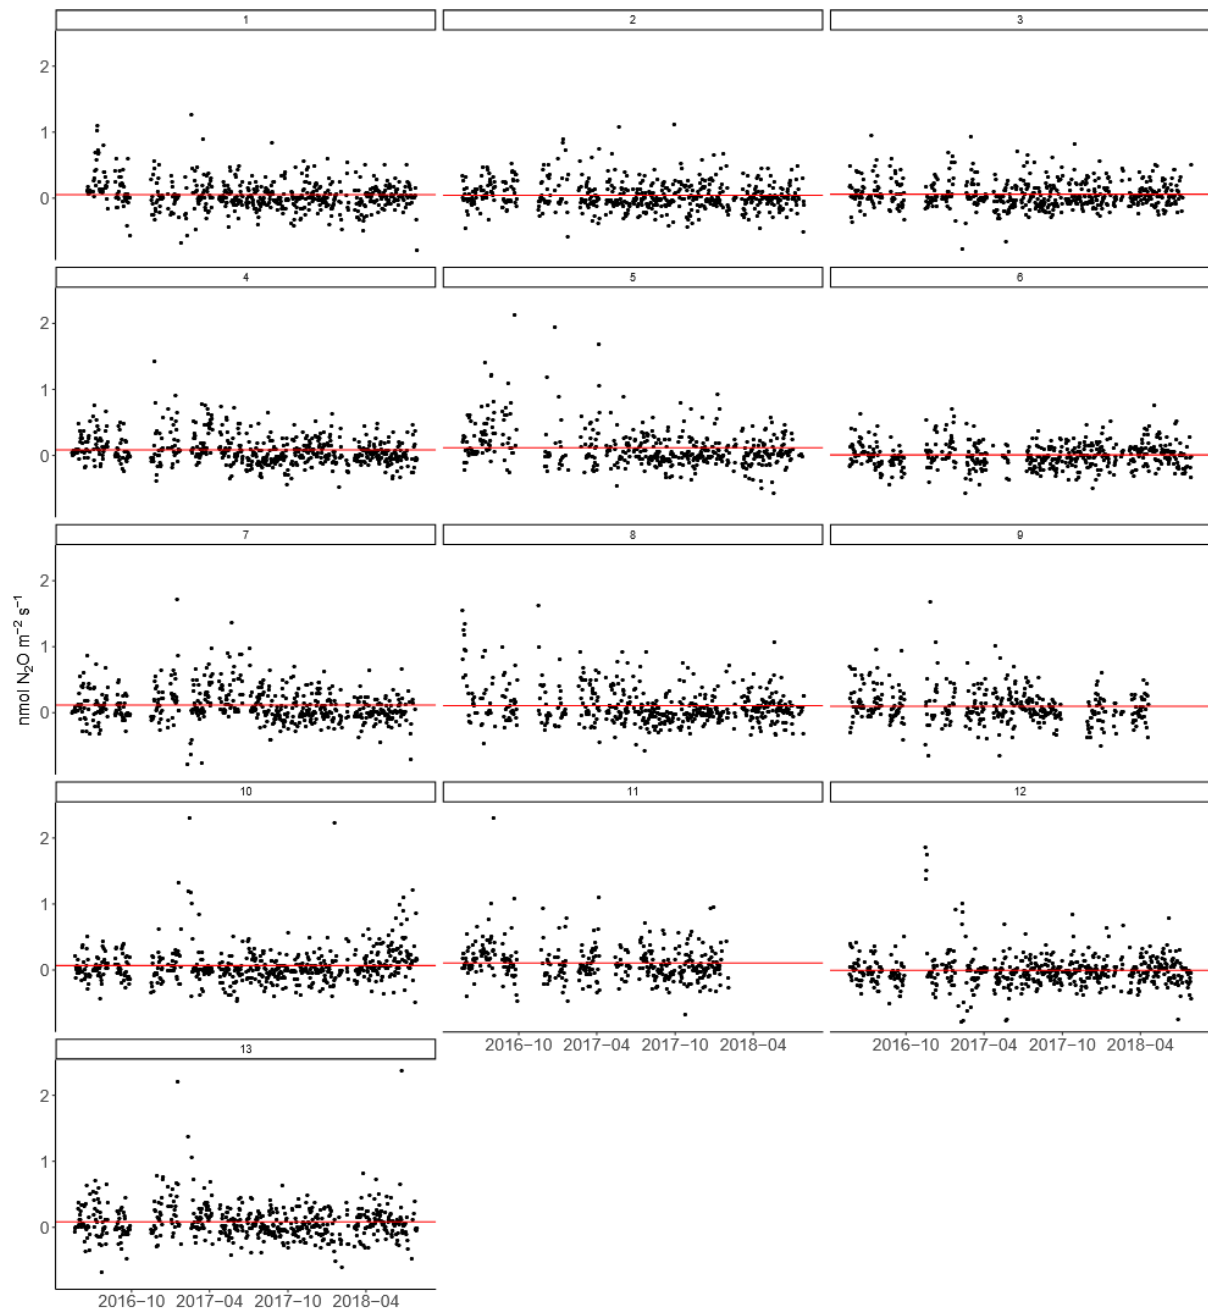

49  
50  
51  
52  
53  
54

**Figure S5.** Average daily upland soil N<sub>2</sub>O fluxes per soil chamber (1 to 13) from 17 May, 2016 to 2 August, 2018 in the Guyaflux tropical forest, French Guiana. Fluxes were estimated with a 25-min closure time (see Sect. 2.5, “Chamber-based CH<sub>4</sub> and N<sub>2</sub>O flux computation”, for more details). All panels have the same limits on the y-axis. The horizontal red lines indicate the average flux line for each chamber.



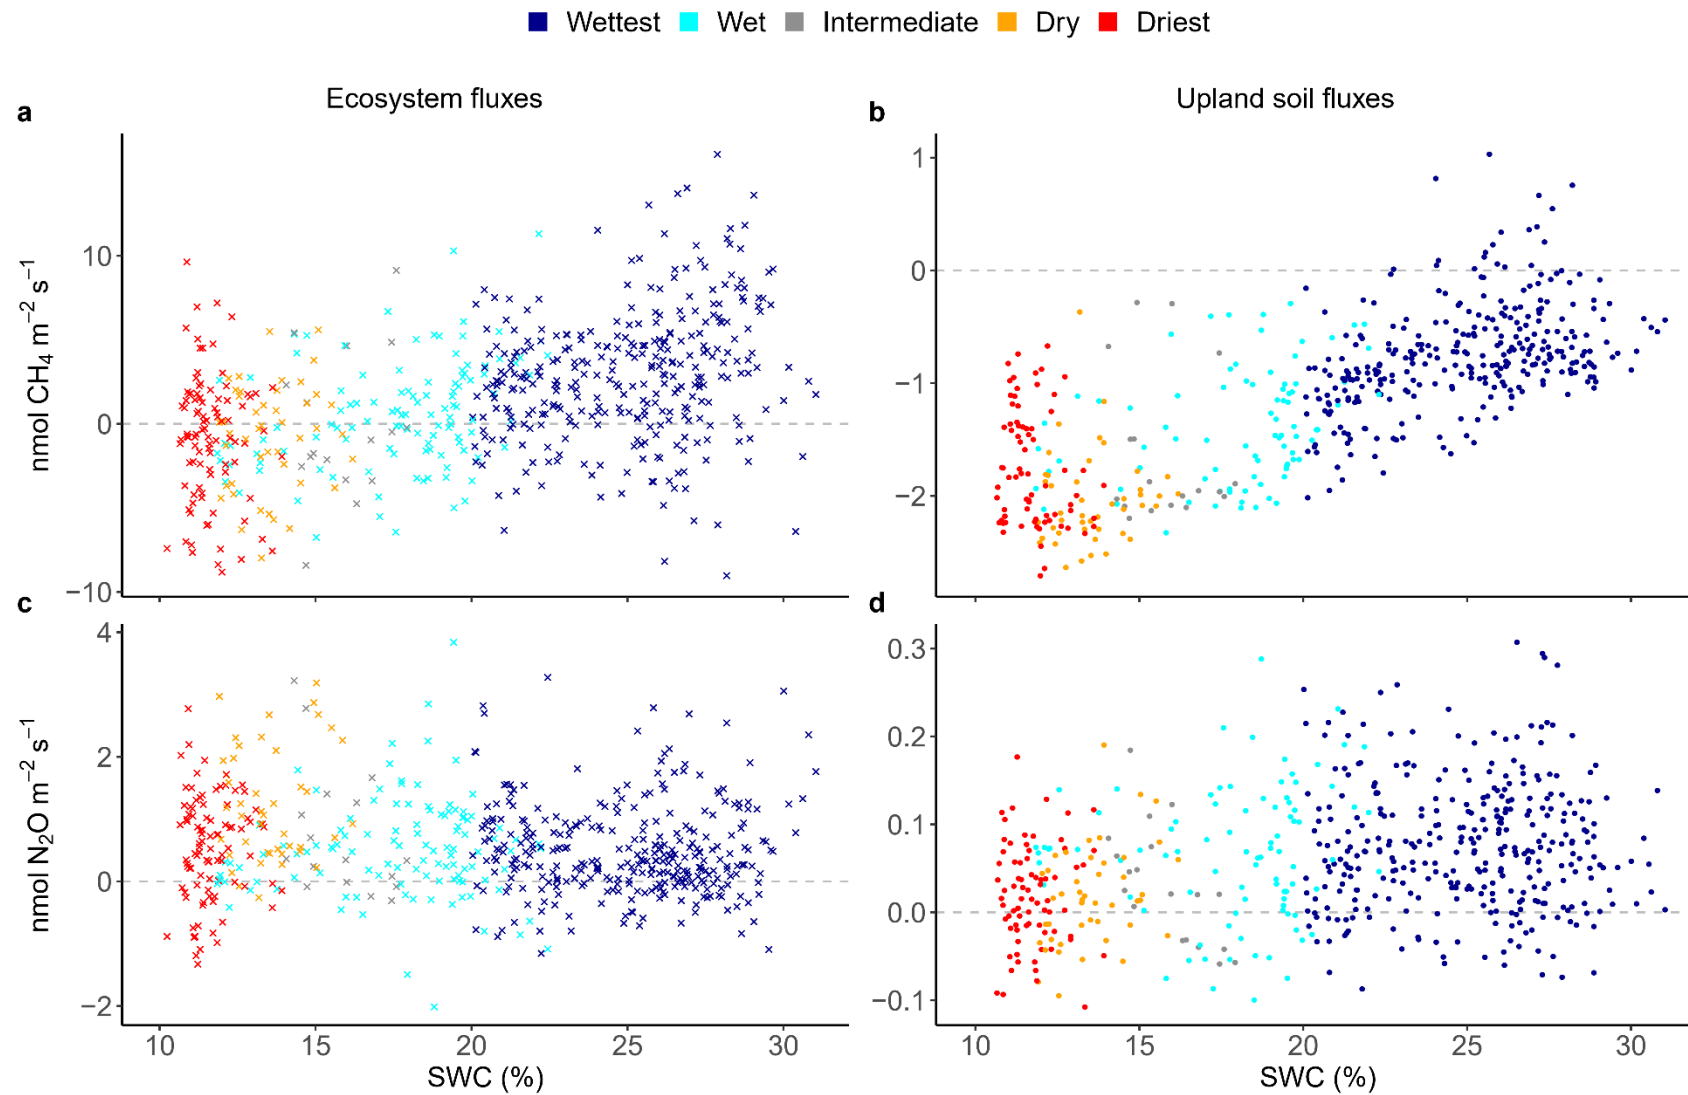

55 **Figure S6.** Relationships between average daily soil water content (SWC), and average daily ecosystem (crosses on the left) and upland soil (solid dots on the  
 56 right) fluxes of (a-b) CH<sub>4</sub> and (c-d) N<sub>2</sub>O for the wet, intermediate, and dry seasons, and two contrasted seasons defined as wettest (dark blue dots) and driest  
 57 (red dots), from 17 May, 2016 to 2 August, 2018 in the Guyaflux tropical forest, French Guiana. Positive fluxes indicate emissions and negative fluxes indicate  
 58 uptake.

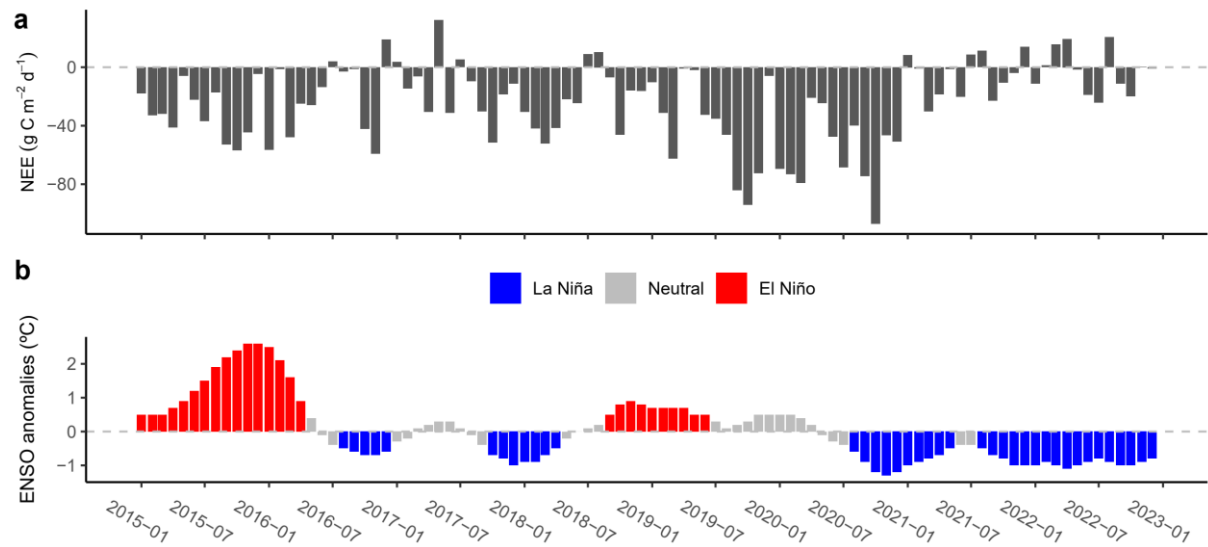

**Figure S7.** (a) Monthly accumulated net ecosystem exchange (NEE) and (b) El Niño-Southern Oscillation Event (ENSO) anomalies: cold (blue, known as La Niña) and warm (red, known as El Niño) periods based on a threshold of  $\pm 0.5^{\circ}\text{C}$  for the Oceanic Niño Index (<https://origin.cpc.ncep.noaa.gov>).

65   **References**

66

67   Fang, J., Fang, J., Chen, B., Zhang, H., Dilawar, A., Guo, M., Liu, S.: Assessing Spatial Representativeness  
68       of Global Flux Tower Eddy-Covariance Measurements Using Data from FLUXNET2015, Sci. Data.,  
69       11, 569, <https://doi.org/10.1038/s41597-024-03291-3>, 2024.

70

71   Guitet, S., Brunaux, O., De Granville, J. J., Gonzalez, S., Richard-Hansen, C., Sabatier, D.: Catalogue des  
72       habitats forestiers de Guyane, ONF-Direction de l'environnement, de l'aménagement et du  
73       logement de Guyane (DEAL), 2015.
